# Supplementary material for: Miconia lucenae (Melastomataceae), a new species from montane Atlantic Forest in Espírito Santo, Brazil
Source: PeerJ. 2020 Mar 19;8:e8752. doi: 10.7717/peerj.8752 (PMC7085899; doi:10.7717/peerj.8752)
Supplement: Table S1 [file peerj-08-8752-s001.xlsx]

## Sheet: Genbank_accessions
Names after Miconia's new circumscription	Names before Miconia's new circumscription	atpF-atpH	nrETS	nrITS	ndhF	psbK-psbI	trnS-trnG
Eriocnema fulva	-	MH743998.1	KF820735	MH743831.1	AY553781	KF821935	-
Miconia albicans	-	MH744009.1	KF820909	KF821554	EU055978	KF822092	-
Miconia antillana	Mecranium integrifolium	-	KF820864	KF821531	-	KF822051	-
Miconia ayisyena	Mecranium haitiense	-	KJ933916	KJ933962	-	KJ934016	-
Miconia bigibbosa	Conostegia bigibbosa	KM887065	KM893530	KM893587	-	KM893674	KM893784
Miconia blepharodes	Pleiochiton blepharodes	GQ139273	KF821342	GQ139302	GQ139316	GQ139330	KR062827
Miconia calycina	-	-	KF820956	EU055737	EU056001	KF822139	-
Miconia cinnamomifolia	-	MH744034.1	KF820982	EU055753	EU056013	KF822166	-
Miconia complanata	-	-	KF821047	KF821615	EU055975	KF822231	-
Miconia crenata	Clidemia hirta	KR062211	KF820666	AY460479	-	KF821866	KR062663
Miconia crenulata	Clidemia crenulata	GQ139277	KF820637	EF418799	EU055910	GQ139333	-
Miconia dodecandra	-	MK296598.1	KF821020	KF821600	EU056026	JQ730527	MK296735.1
Miconia friedmaniorum	Conostegia friedmaniorum	KM887086	KM893533	KM893628	-	KM893722	KM893783
Miconia gonoptera	Tococa gonoptera	-	KF821384	AY460553	-	KF822558	-
Miconia granatensis	Leandra granatensis	-	KF820794	EU055691	EU055949	KF821985	-
Miconia grisebachiana	Calycogonium grisebachii	-	KF820595	EU055646	-	KF821796	EF549709
Miconia hookeriana	-	-	KF821059	EU055781	EU056040	KF822244	-
Miconia lima	Leandra lima	-	KJ933953	KJ934006	EU055952	KJ934059	-
Miconia lucenae	-	MN557427	KF820763	KF821492	-	KF821958	MN557428
Miconia melastomoides	Leandra melastomoides	KR062278	KF820789	EF418830	-	KF821980	KR062736
Miconia michelangeliana	-	-	KF821122	KF821655	-	KF822309	-
Miconia myrtillifolia	-	KX073083	KX073119	KX073165	-	KX073206	KX073187
Miconia octona	Clidemia octona	-	KF820678	KF821450	-	KF821878	KR062664
Miconia paniculata	-	MF952906.1	MF953142.1	MF953156.1	-	MF952921.1	MF952932.1
Miconia paradoxa	-	-	KF821148	-	-	KF822336	-
Miconia pepericarpa	-	MH744077.1	KF821153	KF821676	EU056071	KF822341	-
Miconia petropolitana	-	MH744079.1	KF821154	EU055815	EU056072	KF822342	-
Miconia reversa	Leandra reversa	-	KF820828	EU055701	EU055958	KF822018	-
Miconia stenopetala	Leandra clidemioides	KR062237	KF820777	AY460540	EU055948	KF821968	KR062692
Miconia subhisrsuta	Conostegia icosandra	KM887105	KF820719	AY460486	EU055933	KF821919	KM893781
Miconia tococa	Tococa guianensis	-	KF821385	AY460554	EU056136	KF822559	-
Miconia vulcanidomatia	Calycogonium rhamnoideum	-	KF820605	KF821414	-	KF821806	-
